# Supplementary material
Source: PubMed Central journal article supplement (PMC1599867)

# ELECTRONIC APPENDIX

This is the Electronic Appendix to the article

**Habitat selection and ecological speciation in Galápagos warbler finches (*Certhidea olivacea* and *C. fusca*)**

by

Brandon Tonnis, Peter R. Grant, B. Rosemary Grant and Kenneth Petren

*Proc. R. Soc. B* (doi:10.1098/rspb.2004.3030)

Electronic appendices are refereed with the text; however, no attempt is made to impose a uniform editorial style on the electronic appendices.

## Electronic Appendix 1

Museum specimens screened for genetic variation: AMNH = American Museum of Natural History; BNHM = British Natural History Museum; CAS = California Academy of Sciences.

| Island (English name), Lab #    | Year Collected | Museum Accession number |
|---------------------------------|----------------|-------------------------|
| Darwin (Culpepper), 23          | 1906           | CAS 81109               |
| Darwin (Culpepper), 28          | 1906           | CAS 4676                |
| Fernandina (Narborough), 161    | 1894           | AMNH 522521             |
| Fernandina (Narborough), 162    | 1894           | AMNH 522519             |
| Fernandina (Narborough), 163    | 1894           | AMNH 522523             |
| Floreana (Charles), 46          | 1906           | CAS 4645                |
| Genovesa (Tower), 64            | 1897           | BNHM 1899.9.1.114       |
| Genovesa (Tower), 65            | 1897           | BNHM 1899.9.1.115       |
| Genovesa (Tower), 66            | 1897           | BNHM 1899.9.1.119       |
| Hermanos (Crossman), 133        | 1902           | AMNH 522532             |
| Hermanos (Crossman), 134        | 1902           | AMNH 522536             |
| Hermanos (Crossman), 156        | 1902           | AMNH 522537             |
| Hermanos (Crossman), 157        | 1902           | AMNH 522535             |
| Marchena (Bindloe), 126         | 1899           | CAS 81113               |
| Marchena (Bindloe), 127         | 1899           | CAS 81115               |
| Pinzón (Duncan), 124            | 1905           | CAS 4592                |
| Pinzón (Duncan), 153            | 1905           | CAS 4831                |
| Pinzón (Duncan), 154            | 1905           | CAS 4785                |
| Pinzón (Duncan), 155            | 1905           | CAS 4593                |
| Santa Cruz (Indefatigable), 120 | 1906           | CAS 4574                |
| Santa Cruz (Indefatigable), 164 | 1905           | CAS 4566                |
| Wolf (Wenman), 35               | 1898           | CAS 81102               |
| Wolf (Wenman), 63               | 1897           | BNHM 1899.9.1.113       |

## Electronic Appendix 2

Primer pairs used for PCR and sequencing of cytochrome b (5'-3').

Segment 1:

KP1F: GGATCCCTGTTAGGAGTTTGC

BTR1: GGATGGCTGAGAACAGGTTTGT

Segment 2:

SQF1: GAGGCCAAATATCCTTCTGAG

SQR1: CCTAGGATGTCTTTGATGGTGTAG

Segment 3:

SQF2: TCGTACTAATACTCTCTCTGC

KPR1: CTCAGGTTAGGATGAGGACGTTGGTGAC

Relative Locations:

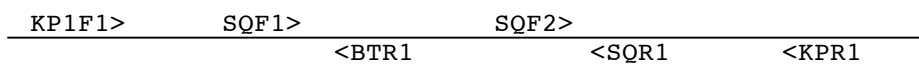

Supplement: rspb20043030s02.pdf [file rspb20043030s02.pdf]
